# Supplementary material
Source: publisher figshare collection journal article supplement (https://acs.figshare.com/ndownloader/files/28818648)
Supplement: Supplementary file 1 [file 28818648]

## Sheet: Sheet1
Protein Target	HiBiT Melting Temperature (Tagg)	ProteomicsDB Melting Temperature (Tagg)	WB CETSA Melting Temperature (Tagg)	Literature Melting Temperature (Tagg)
MAPK14	46.4°C - A549 cells	48.1°C - A549 cells		46.7°C - HL60 cells (ref. 19)
PRKAB1	55.4°C - A549 cells	56.2°C - HEK293 cells
IRAK4	48.2°C - Jurkat cells	50.7°C - Jurkat cells
KRAS	65.6°C - NCI-H358 cells	56.0°C - HEK293 cells	69°C - NCI-H358 cells	52°C (approximate) - MiaPaca2 and BxPC3 cells (ref. 16)
HRAS	65.9°C - NCI-H358 cells	61.4° - HEK293 cells
TP53 (R273H)	42.6°C - MDA-MB-468 cells			42°C (approximate) - HT29 cells (ref. 27)
